# Supplementary material for: High mammographic density in women is associated with protumor inflammation
Source: PubMed Central journal article supplement (PMC6085707; doi:10.1186/s13058-018-1010-2), 2018-08-09
Supplement: 13058_2018_1010_MOESM3_ESM.pdf [file 13058_2018_1010_MOESM3_ESM.pdf]

| Patient | Proliferative/non-proliferative disease |        | Atypical hyperplasia (ADH or ALH) |        | Sclerosing adenosis |        | Columnar cell change |        |
|---------|-----------------------------------------|--------|-----------------------------------|--------|---------------------|--------|----------------------|--------|
|         | HMD                                     | LMD    | HMD                               | LMD    | HMD                 | LMD    | HMD                  | LMD    |
| 1       | absent                                  | absent | absent                            | absent | absent              | absent | absent               | absent |
| 2       | absent                                  | absent | absent                            | absent | absent              | absent | absent               | absent |
| 3       | absent                                  | absent | absent                            | absent | absent              | absent | absent               | absent |
| 4       | absent                                  | absent | absent                            | absent | absent              | absent | absent               | absent |
| 5       | absent                                  | absent | absent                            | absent | absent              | absent | absent               | absent |
| 6       | absent                                  | absent | absent                            | absent | absent              | absent | absent               | absent |
| 7       | absent                                  | absent | absent                            | absent | absent              | absent | absent               | absent |
| 8       | absent                                  | absent | absent                            | absent | absent              | absent | absent               | absent |
| 9       | absent                                  | absent | absent                            | absent | focal               | absent | absent               | absent |
| 10      | absent                                  | absent | absent                            | absent | absent              | absent | absent               | absent |
| 11      | absent                                  | absent | absent                            | absent | absent              | absent | absent               | absent |
| 12      | absent                                  | absent | absent                            | absent | absent              | absent | absent               | absent |
| 13      | absent                                  | absent | absent                            | absent | focal               | absent | absent               | focal  |
| 14      | absent                                  | absent | absent                            | absent | absent              | absent | absent               | absent |
| 15      | absent                                  | absent | absent                            | absent | absent              | absent | focal                | absent |
