# Supplementary material for: High mammographic density in women is associated with protumor inflammation
Source: PubMed Central journal article supplement (PMC6085707; doi:10.1186/s13058-018-1010-2), 2018-08-09

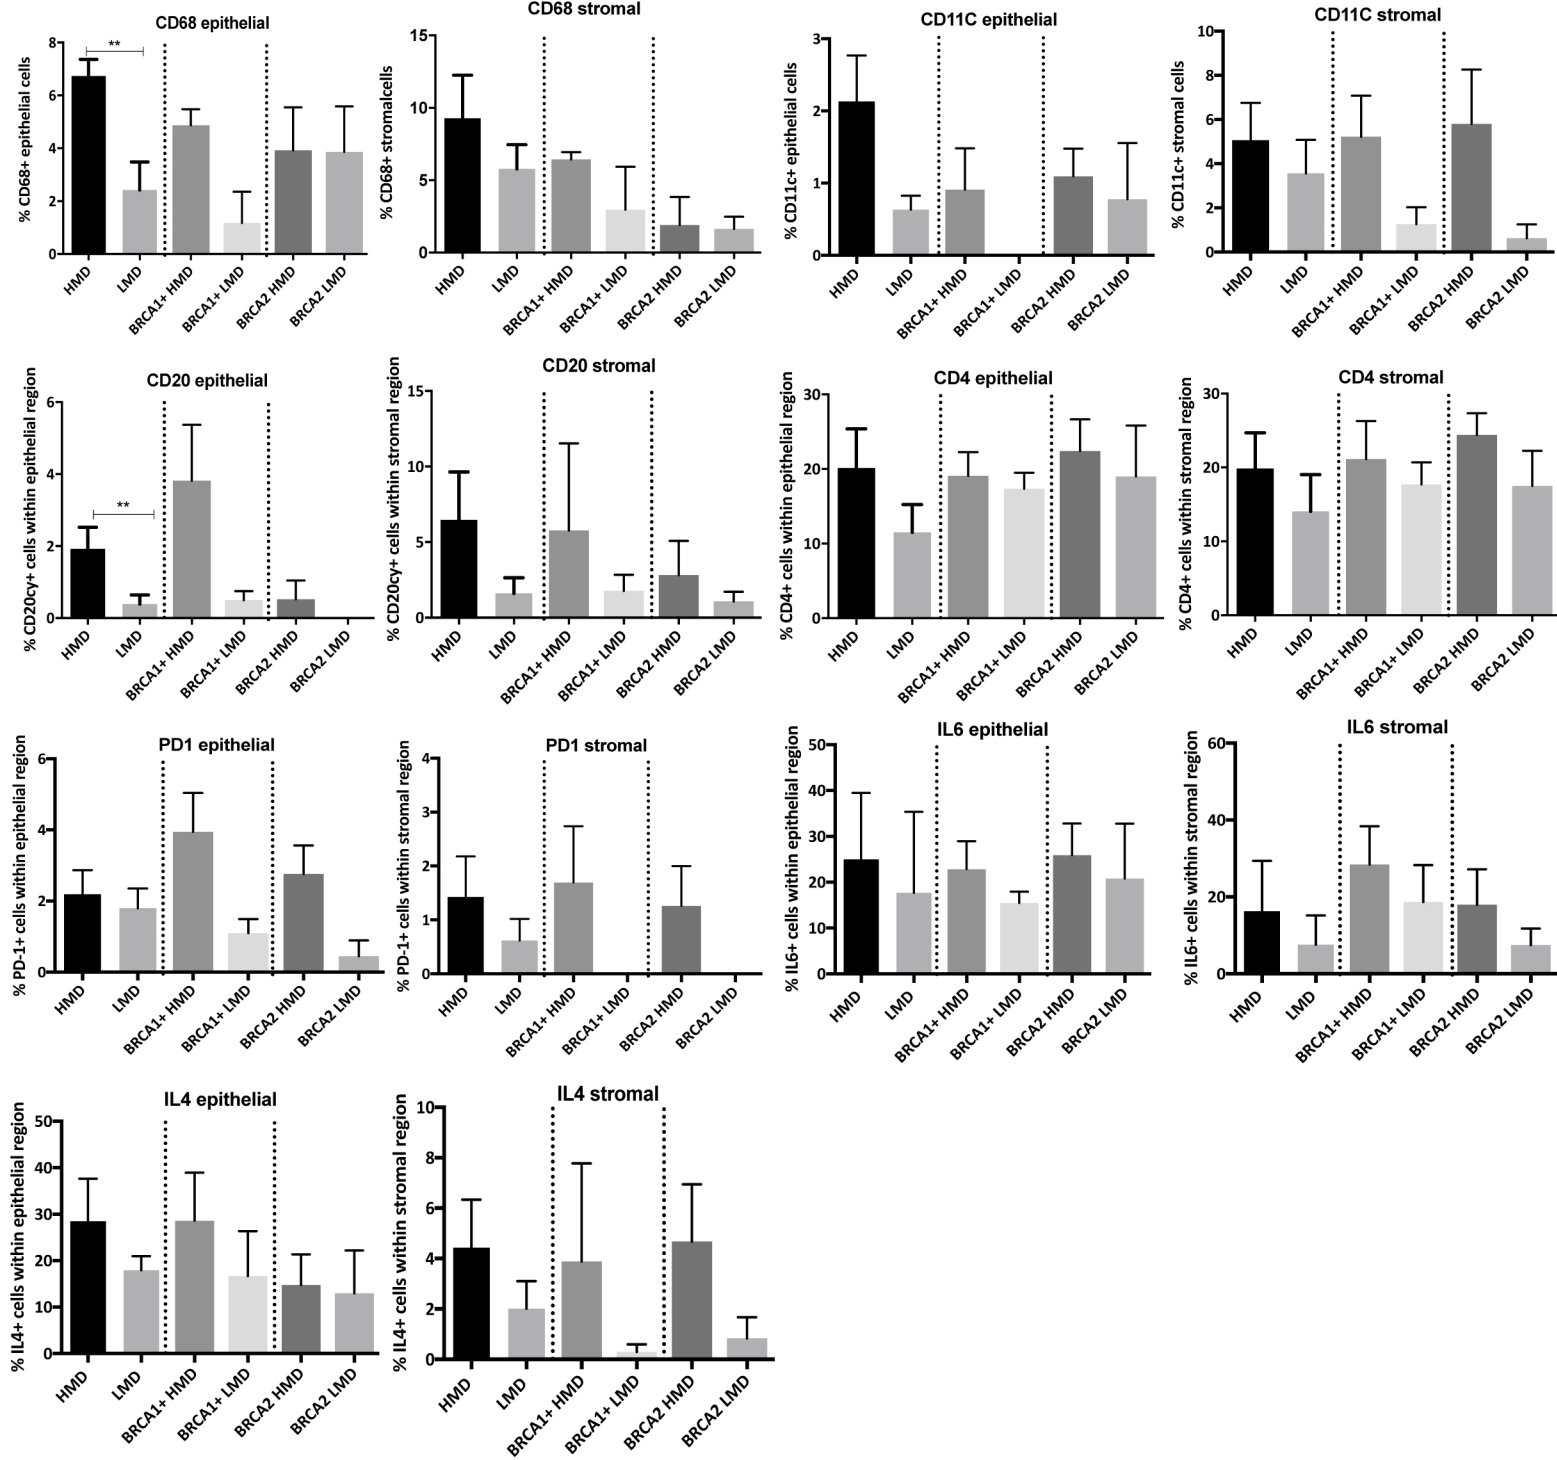

Supplement: 13058_2018_1010_MOESM4_ESM.pdf [file 13058_2018_1010_MOESM4_ESM.pdf]
