# Supplementary material for: High mammographic density in women is associated with protumor inflammation
Source: Springer Nature journal article supplement (doi:10.1186/s13058-018-1010-2), 2018-08-09

**A**

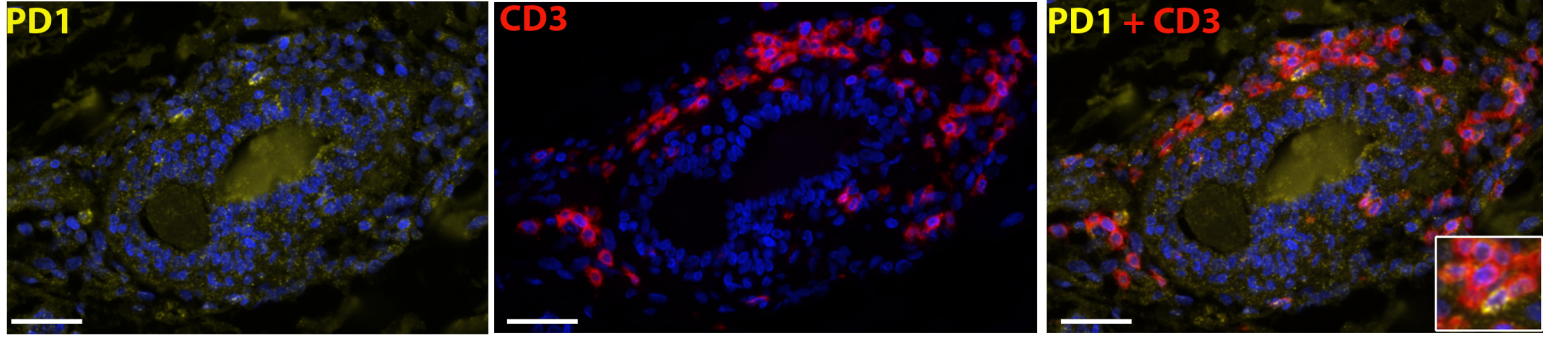

**B**

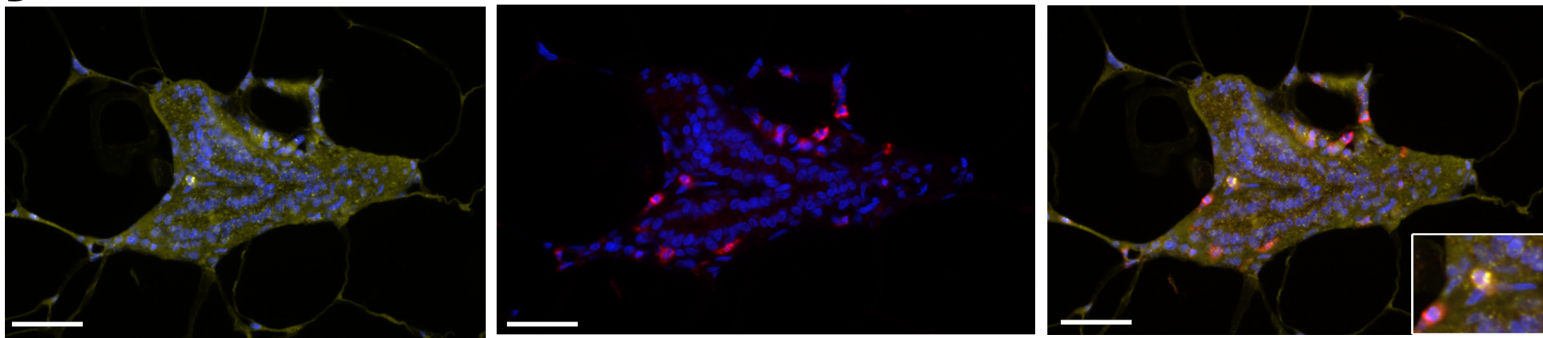

Supplement: MOESM1 [file 16023962]
